# Supplementary material for: Regulatory interactions between APOBEC3B N- and C-terminal domains
Source: PubMed Central journal article supplement — bioRxiv. 2024 Dec 12:2024.12.11.628032. Preprint. [Version 1] doi: 10.1101/2024.12.11.628032 (PMC11661193; doi:10.1101/2024.12.11.628032), 2024-12-12
Supplement: media-1.pdf [file media-1.pdf]

## Regulatory interactions between APOBEC3B N- and C-terminal domains

Mac Kevin E. Braza,<sup>1</sup> Özlem Demir,<sup>1,+</sup> Surl-Hee Ahn,<sup>2</sup> Clare K. Morris,<sup>1</sup> Carla Calvó-Tusell,<sup>3</sup> Kelly L. McGuire,<sup>1</sup> Bárbara de la Peña Avalos,<sup>4</sup> Michael A. Carpenter,<sup>4,5</sup> Yanjun Chen,<sup>4</sup> Lorenzo Casalino,<sup>3</sup> Hideki Aihara,<sup>6</sup> Mark A. Herzik, Jr.,<sup>1</sup> Reuben S. Harris,<sup>4,5</sup> and Rommie E. Amaro<sup>3\*</sup>

<sup>1</sup>Department of Chemistry and Biochemistry, University of California, San Diego, La Jolla, CA

<sup>2</sup>Department of Chemical Engineering, University of California, Davis, Davis, CA

<sup>3</sup>Department of Molecular Biology, University of California, San Diego, La Jolla, CA

<sup>4</sup>Department of Biochemistry and Structural Biology, University of Texas Health San Antonio, San Antonio, TX

<sup>5</sup>Howard Hughes Medical Institute, University of Texas Health San Antonio, San Antonio, TX

<sup>6</sup>Department of Biochemistry, Molecular Biology and Biophysics, University of Minnesota, Minneapolis, MN

<sup>+</sup>Current Address: Novartis Biomedical Research, San Diego, CA

Corresponding Author's E-mail: ramaro@ucsd.edu

### SUPPLEMENTARY INFORMATION

Contents

Figures

**SI Figure 1.** CryoEM data processing of the full-length APOBEC3B and maltose binding protein complex.

**SI Figure 2.** Workflow in modeling and refining the human full-length APOBEC3B (fl-A3B).

**SI Figure 3.** Protein backbone root-mean-square deviation.

**SI Figure 4.** R210-Y315, R211-Y315, and R212-Y315 distances.

**SI Figure 5.** Representative conformation of the Y315 Chi1 dihedral angle in a partially open and open states active site.

**SI Figure 6.** GaMD simulations of fl-A3B.

Movies

**SI Movie 1.** A3Bctd dynamics from classical MD simulations.

**SI Movie 2.** fl-A3B dynamics from classical MD simulations.

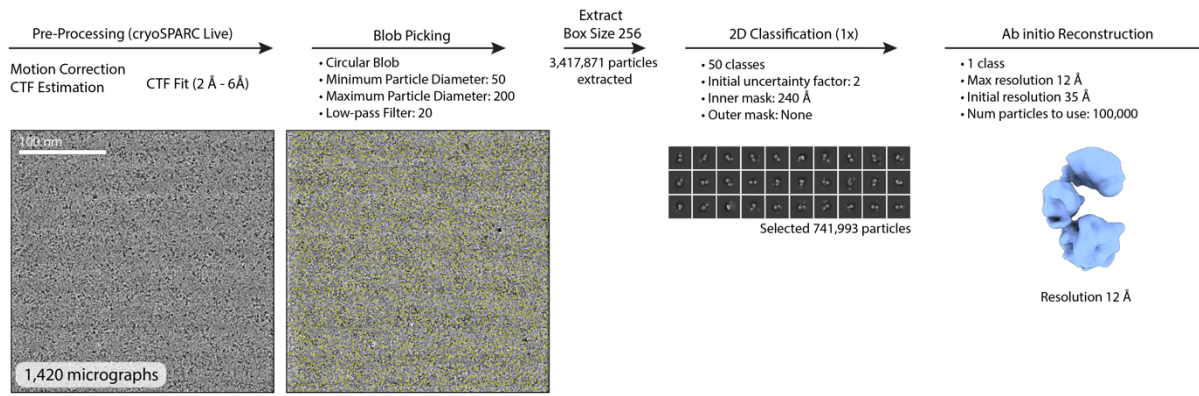

**SI Figure 1.** CryoEM data processing of the full-length APOBEC3B and maltose binding protein complex. See main text Methods section for detailed explanation of cryoEM data processing.

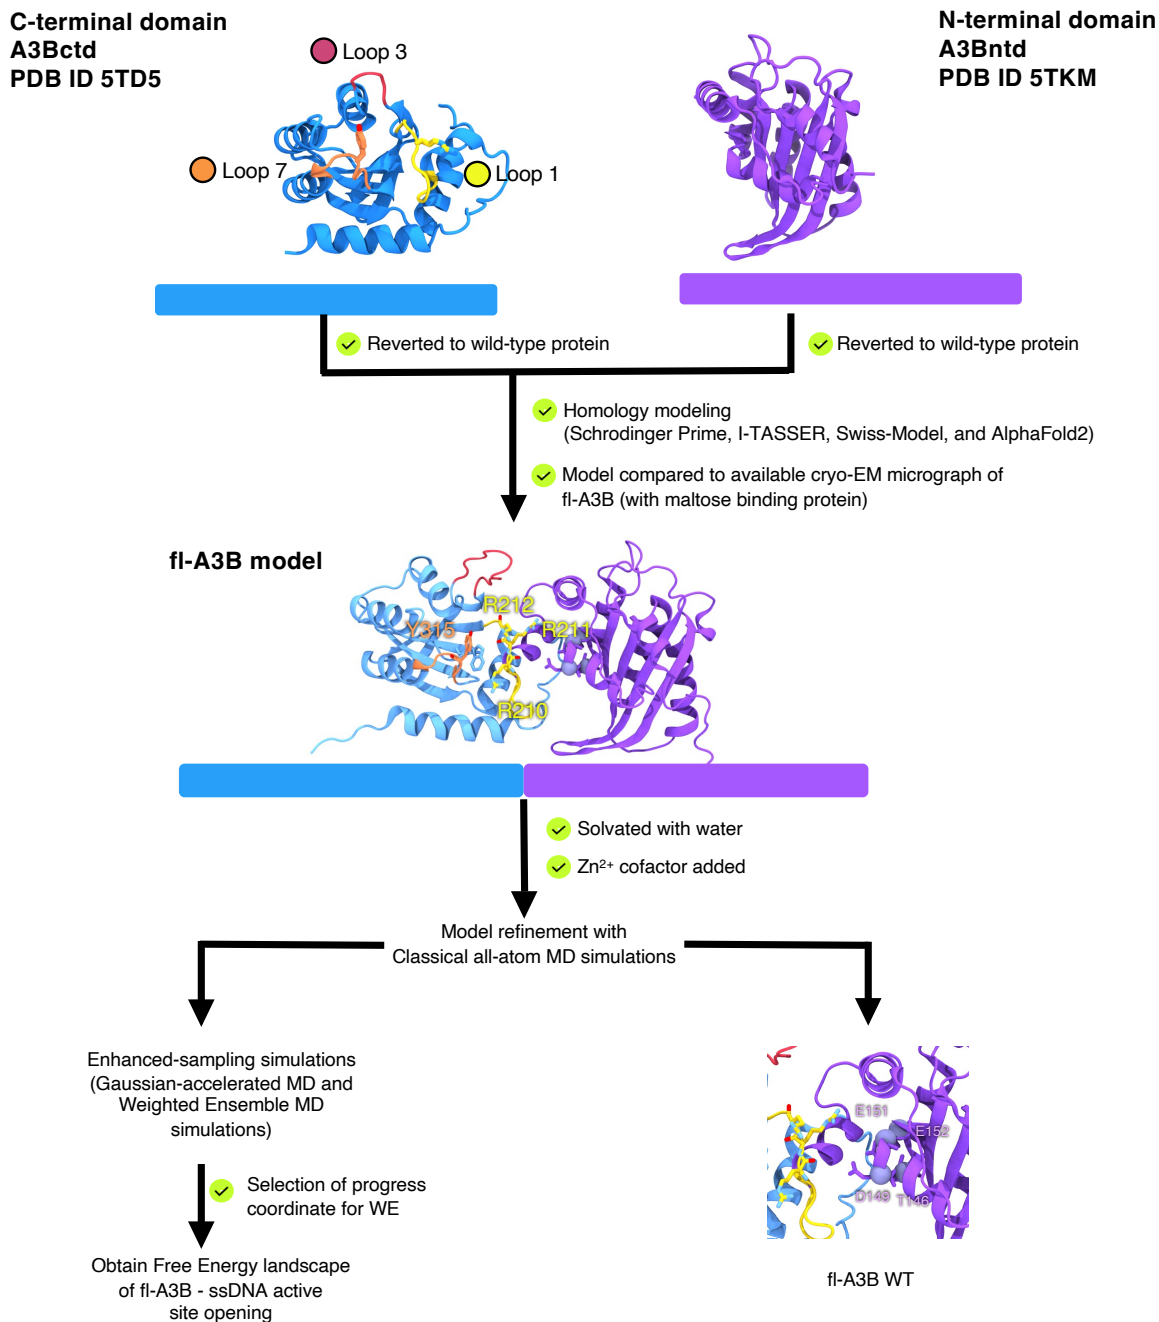

**SI Figure 2.** Workflow in modeling and refining the human full-length APOBEC3B (fl-A3B). Reference structures for homology modeling of fl-A3B PDB ID 5TD5 (ssDNA substrate removed)<sup>3</sup> and 5TKM have several mutations. We reverted them to the wild-type A3Bctd and A3Bntd. Models were refined with conventional all-atom MD simulations and were used for further modeling and simulations work (i.e., Gaussian accelerated and WE method MD simulations and mutations study on fl-A3B N-terminal domain residues).

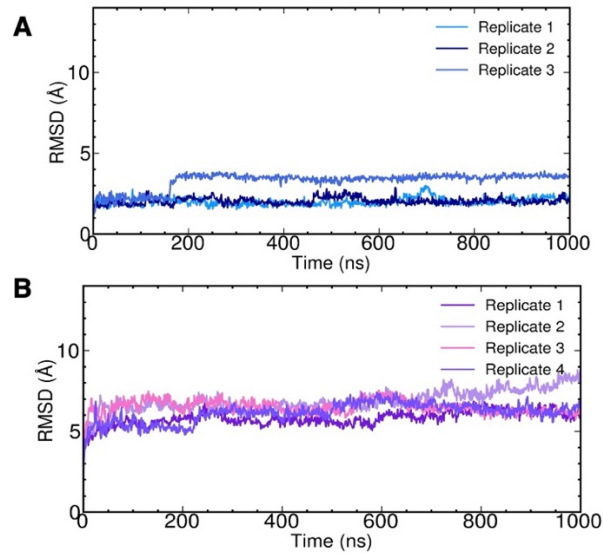

**SI Figure 3.** Protein backbone root-mean-square deviation (RMSD). (A) A3Bctd and (B) fl-A3B Wild-type.

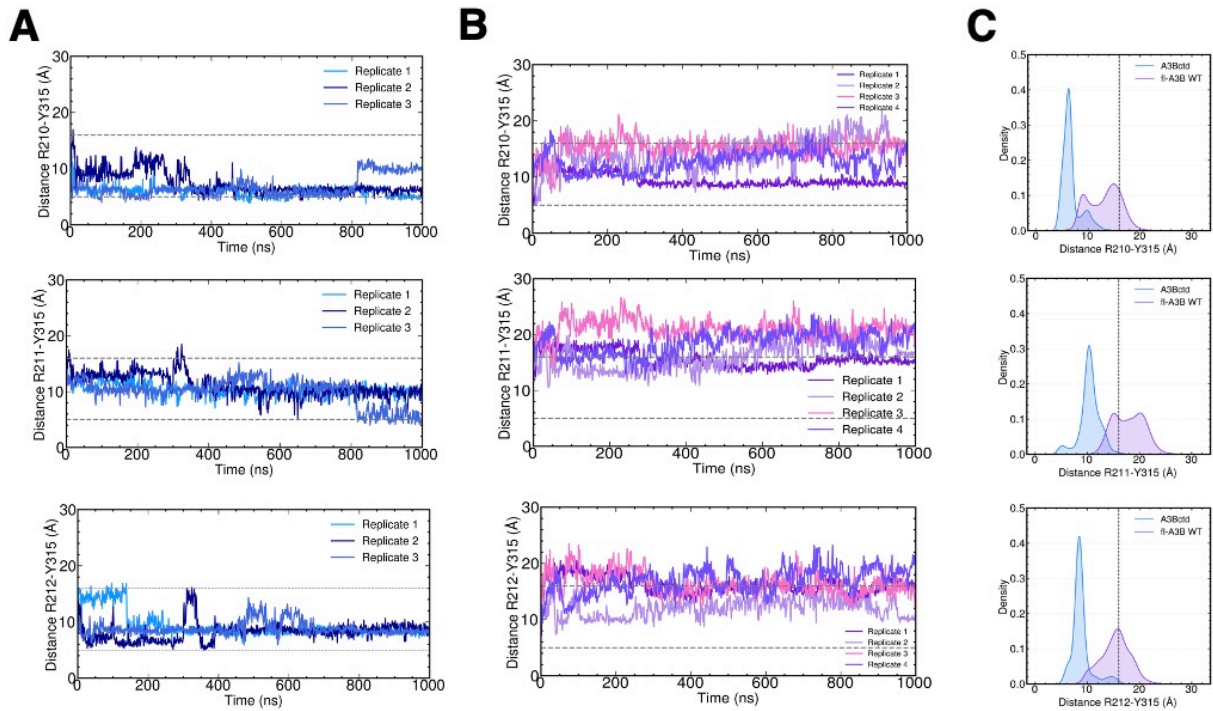

**SI Figure 4.** R210-Y315, R211-Y315, and R212-Y315 distances (A) A3Bctd; (B) fl-A3B; and (C) Kernel Density Estimates of the distances.

Partially-open state A3B active site

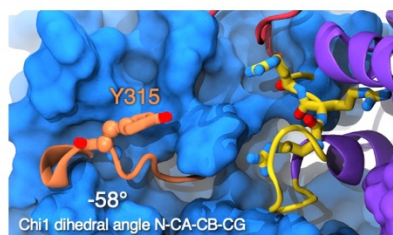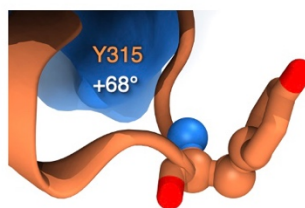

open-state A3B active site

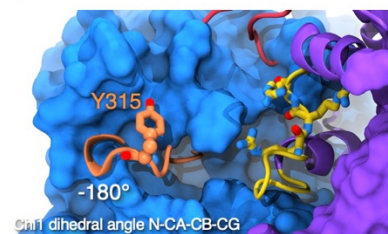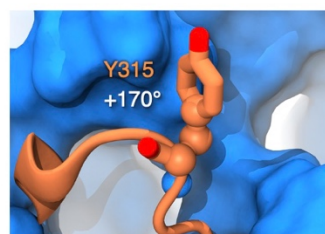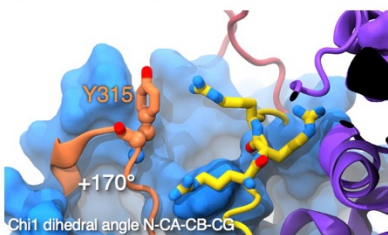

**SI Figure 5.** Representative conformation of the Y315 Chi1 dihedral angle in a partially open and open states active site.

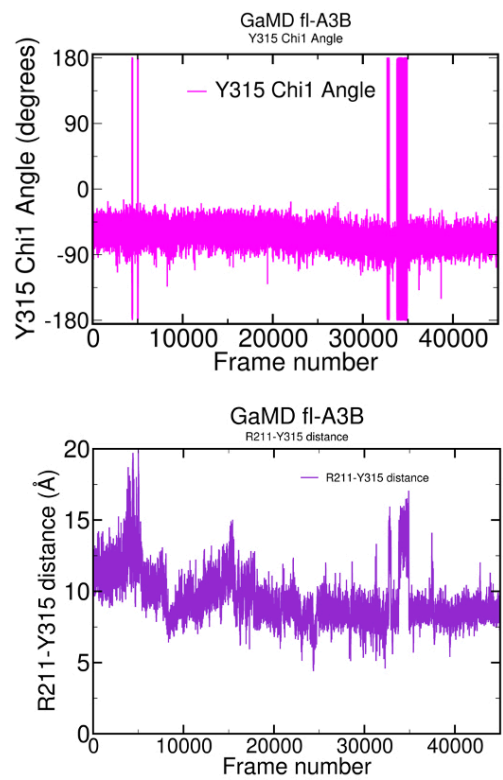

**SI Figure 6.** GaMD simulations of fl-A3B. Y315 Chi1 dihedral angle values (top) and R211-Y315 distance values (bottom).
